# Supplementary material
Source: MDPI journal article supplement (https://www.mdpi.com/2073-4344/7/9/276)
Supplement: s1 [file s1]

# Supplementary Materials: The Preparation of a Highly Efficient $\text{Ag}_3\text{PO}_4/\text{Ag}/\text{Bi}_2\text{O}_2\text{CO}_3$ Photo-Catalyst and the Study of Its Photo-Catalytic Organic Synthesis Reaction Driven by Visible Light

Zhi Guo, Hui Xin, Jingjing Ma, Meifen Bai, Yan Wang and Jingyi Li \*

College of Chemistry and Chemical Engineering, Inner Mongolia University, Hohhot 010021, China; 761737704@qq.com (Z.G.); 171724951@qq.com (H.X.); ziluobo2010@qq.com (J.M.); 1105187121@qq.com (M.B.); 654164408@qq.com (Y.W.)

\* Correspondence: lijingyicn@163.com; Tel.: +86-138-4812-9221

Received: 18 August 2017; Accepted: 14 September 2017; Published: 17 September 2017

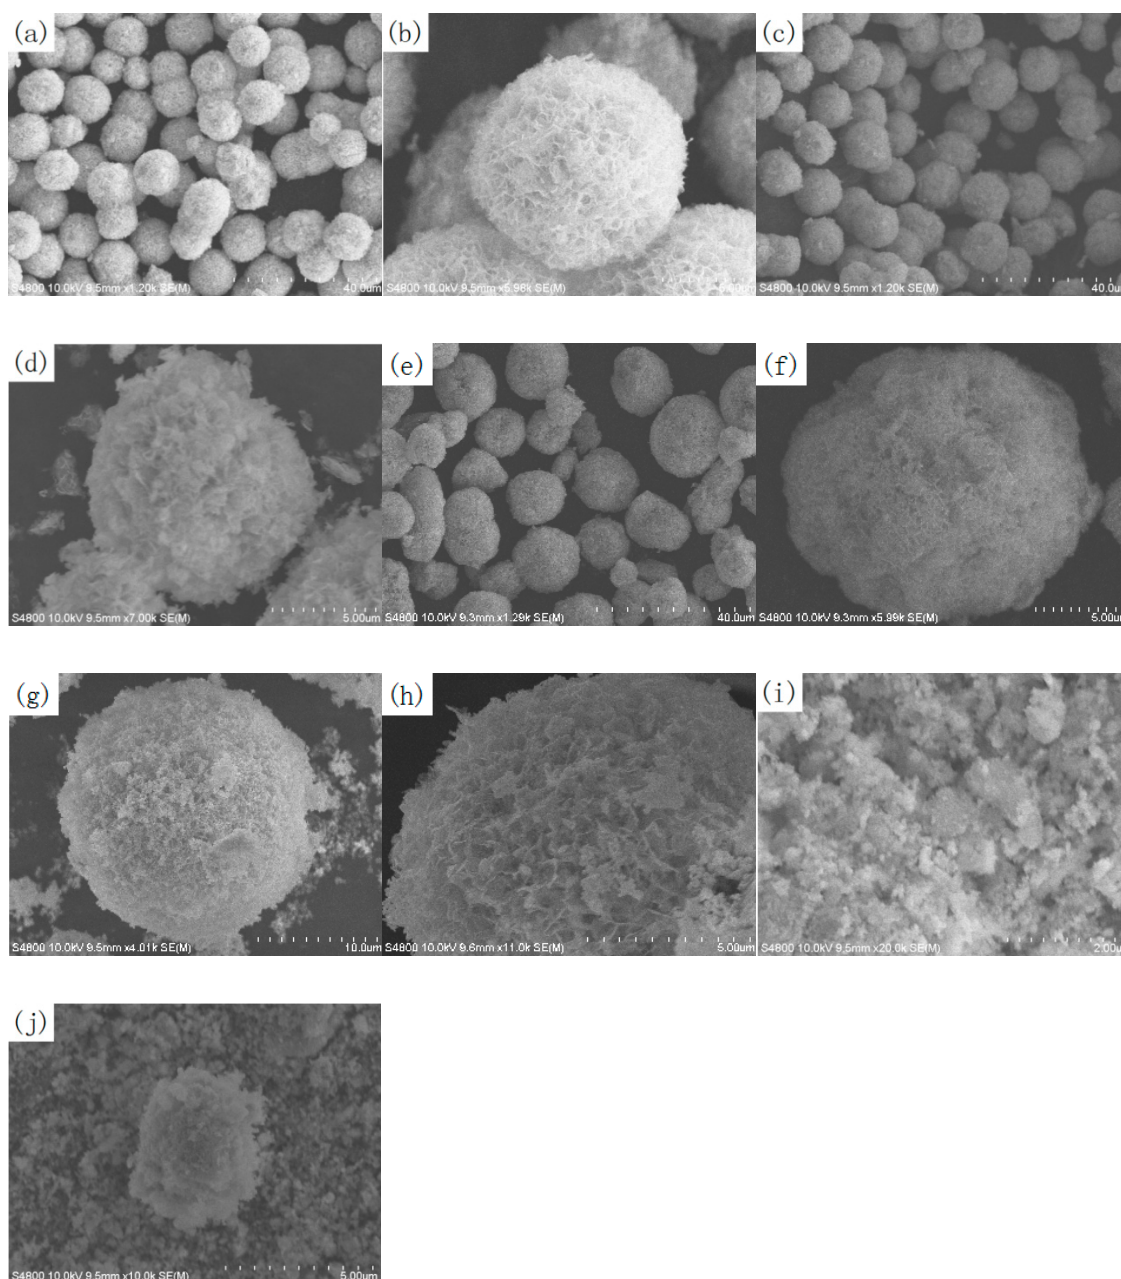

**Figure S1.** SEM images of the photo-catalysts (a,b) Bi<sub>2</sub>O<sub>2</sub>CO<sub>3</sub> (c,d) 10 wt% Ag/Bi<sub>2</sub>O<sub>2</sub>CO<sub>3</sub> (e,f) 64 wt% Ag<sub>3</sub>PO<sub>4</sub>/Bi<sub>2</sub>O<sub>2</sub>CO<sub>3</sub> (g,h) 71 wt% Ag<sub>3</sub>PO<sub>4</sub>/Ag/Bi<sub>2</sub>O<sub>2</sub>CO<sub>3</sub> (i,j) reused 71 wt% Ag<sub>3</sub>PO<sub>4</sub>/Ag/Bi<sub>2</sub>O<sub>2</sub>CO<sub>3</sub>.

**Table S1.** BET surface areas of the photo-catalysts supported on Bi<sub>2</sub>O<sub>2</sub>CO<sub>3</sub> and Bi<sub>2</sub>O<sub>2</sub>CO<sub>3</sub>.

| Sample                                                                                | BET Surface Area (m <sup>2</sup> ·g <sup>-1</sup> ) |
|---------------------------------------------------------------------------------------|-----------------------------------------------------|
| Bi <sub>2</sub> O <sub>2</sub> CO <sub>3</sub>                                        | 51.05                                               |
| Ag/Bi <sub>2</sub> O <sub>2</sub> CO <sub>3</sub>                                     | 46.11                                               |
| Ag <sub>3</sub> PO <sub>4</sub> /Bi <sub>2</sub> O <sub>2</sub> CO <sub>3</sub>       | 33.13                                               |
| 57%Ag <sub>3</sub> PO <sub>4</sub> /Ag/Bi <sub>2</sub> O <sub>2</sub> CO <sub>3</sub> | 18.14                                               |
| 64%Ag <sub>3</sub> PO <sub>4</sub> /Ag/Bi <sub>2</sub> O <sub>2</sub> CO <sub>3</sub> | 15.91                                               |
| 68%Ag <sub>3</sub> PO <sub>4</sub> /Ag/Bi <sub>2</sub> O <sub>2</sub> CO <sub>3</sub> | 13.21                                               |
| 71%Ag <sub>3</sub> PO <sub>4</sub> /Ag/Bi <sub>2</sub> O <sub>2</sub> CO <sub>3</sub> | 11.27                                               |
| 73%Ag <sub>3</sub> PO <sub>4</sub> /Ag/Bi <sub>2</sub> O <sub>2</sub> CO <sub>3</sub> | 7.90                                                |

**Table S2.** Synthesis of esters from benzyl alcohol and methanol using 71 wt% Ag<sub>3</sub>PO<sub>4</sub>/Ag/Bi<sub>2</sub>O<sub>2</sub>CO<sub>3</sub>.

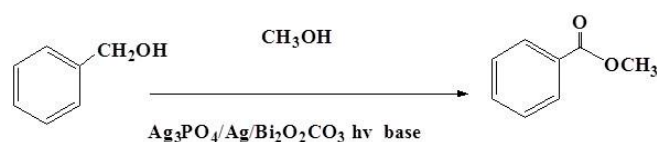

| Entry | Base                                    | Alcohol  | In the Visible Light |          | In the Dark |          |
|-------|-----------------------------------------|----------|----------------------|----------|-------------|----------|
|       |                                         |          | Conv. (%)            | Sel. (%) | Conv. (%)   | Sel. (%) |
| 1     | 0.6mmol Cs <sub>2</sub> CO <sub>3</sub> | Methanol | 93.5                 | 83.1     | 11.1        | 51.3     |
| 2     | K <sub>2</sub> CO <sub>3</sub>          | Methanol | 36.6                 | 71.7     | 3.7         | 88.5     |
| 3     | Na <sub>2</sub> CO <sub>3</sub>         | Methanol | 10.8                 | 83.2     | 2.6         | 81.2     |
| 4     | NaOH                                    | Methanol | 47.4                 | 83.5     | 10.2        | 78.9     |
| 5     | Triethylamine (NEt <sub>3</sub> )       | Methanol | 20.1                 | 88.2     | 4.5         | 80.1     |
| 6     | 0.4mmol Cs <sub>2</sub> CO <sub>3</sub> | Methanol | 68.8                 | 77.5     | 4.7         | 43.6     |
| 7     | 0.8mmol Cs <sub>2</sub> CO <sub>3</sub> | Methanol | 86.8                 | 82.0     | 13.6        | 67.2     |
| 8     | 1.0mmol Cs <sub>2</sub> CO <sub>3</sub> | Methanol | 81.5                 | 78.7     | 16.2        | 46.3     |

Reaction conditions: benzyl alcohol (1.0 mmol), base, Ag<sub>3</sub>PO<sub>4</sub>/Ag/Bi<sub>2</sub>O<sub>2</sub>CO<sub>3</sub> catalyst (30 mg) were added to methanol (8 mL). The reaction flask was stirred magnetically and was irradiated with a 500 W Philips halogen lamp (wavelength range of 400–800 nm, and a light intensity of 2.5×10<sup>-2</sup> W·cm<sup>-2</sup>) as the visible light source under an air atmosphere at 35 ± 3 °C. After running for 24 h, the reaction conversion and selectivity were determined by GC (gas chromatography).

**Table S3.** Synthesis of imines from benzyl alcohol and aniline using 71wt% Ag<sub>3</sub>PO<sub>4</sub>/Ag/Bi<sub>2</sub>O<sub>2</sub>CO<sub>3</sub>.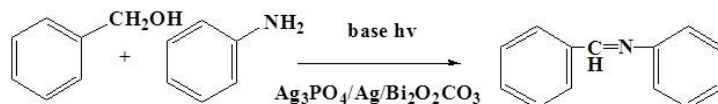

| Entry | Base                                    | Solvent                     | In the Visible Light |          | In the Dark |          |
|-------|-----------------------------------------|-----------------------------|----------------------|----------|-------------|----------|
|       |                                         |                             | Conv. (%)            | Sel. (%) | Conv. (%)   | Sel. (%) |
| 1     | 0.8mmol Cs <sub>2</sub> CO <sub>3</sub> | Benzotrifluoride            | 80.5                 | 93.1     | 9.6         | 89.2     |
| 2     | K <sub>2</sub> CO <sub>3</sub>          | Benzotrifluoride            | 55.7                 | 99.4     | 5.2         | 99       |
| 3     | KOH                                     | Benzotrifluoride            | 44.2                 | 94.0     | 8.6         | 89.2     |
| 4     | NaOH                                    | Benzotrifluoride            | 73.9                 | 96.2     | 9.3         | 99       |
| 5     | LiOH                                    | Benzotrifluoride            | 74.9                 | 98.6     | 7.2         | 99       |
| 6     | Cs <sub>2</sub> CO <sub>3</sub>         | Cyclohexane                 | 27.6                 | 93.1     | 7.9         | 92.4     |
| 7     | Cs <sub>2</sub> CO <sub>3</sub>         | Dimethyl sulfoxide (DMSO)   | 29.9                 | >99      | 13.2        | >99      |
| 8     | Cs <sub>2</sub> CO <sub>3</sub>         | N,N-Dimethylformamide (DMF) | 32.5                 | 88.9     | 2.8         | 78.6     |
| 9     | Cs <sub>2</sub> CO <sub>3</sub>         | Mesitylene                  | 31.5                 | >99      | 4.7         | >99      |
| 10    | Cs <sub>2</sub> CO <sub>3</sub>         | Toluene                     | 28.6                 | >99      | 11.1        | >99      |
| 11    | Cs <sub>2</sub> CO <sub>3</sub>         | Isopropanol                 | 11.1                 | 66.7     | 3.6         | 67.2     |
| 12    | 0.4mmol Cs <sub>2</sub> CO <sub>3</sub> | Benzotrifluoride            | 20.2                 | 67.4     | 1.4         | 76.3     |
| 13    | 0.6mmol Cs <sub>2</sub> CO <sub>3</sub> | Benzotrifluoride            | 34.9                 | 77.7     | 2.0         | 78.9     |
| 14    | 1.0mmol Cs <sub>2</sub> CO <sub>3</sub> | Benzotrifluoride            | 77.6                 | 88.4     | 2.6         | 81.3     |

Reaction conditions: alcohol (1.0 mmol), aniline (0.5 mmol), base and Ag<sub>3</sub>PO<sub>4</sub>/Ag/Bi<sub>2</sub>O<sub>2</sub>CO<sub>3</sub> catalyst (30 mg) were added to solvent (6 mL). The reaction flask was stirred magnetically and was irradiated with a 500 W Philips halogen lamp (wavelength range of 400–800 nm, and a light intensity of 2.5×10<sup>-2</sup> W·cm<sup>-2</sup>) as the visible light source under an air atmosphere at 35 ± 3 °C. After running for 24 h, the reaction conversion and selectivity were determined by GC.

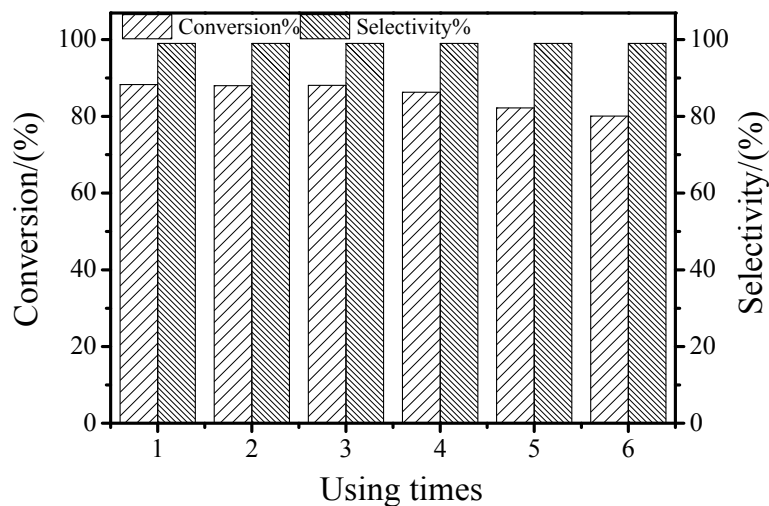**Figure S2.** Photo-catalytic activity of the 71 wt% Ag<sub>3</sub>PO<sub>4</sub>/Ag/Bi<sub>2</sub>O<sub>2</sub>CO<sub>3</sub> catalyst after being used for 6 times.

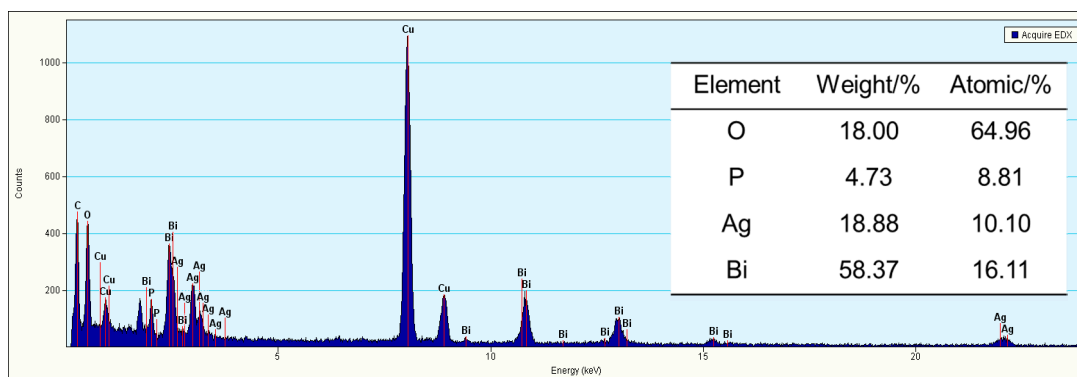

Figure S3. EDX image of 71 wt%  $\text{Ag}_3\text{PO}_4/\text{Ag}/\text{Bi}_2\text{O}_2\text{CO}_3$  after reusing.

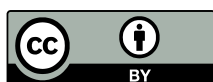

© 2017 by the authors. Licensee MDPI, Basel, Switzerland. This article is an open access article distributed under the terms and conditions of the Creative Commons Attribution (CC BY) license (<http://creativecommons.org/licenses/by/4.0/>).
